# Supplementary material
Source: publisher figshare collection journal article supplement (https://acs.figshare.com/ndownloader/files/8630293)
Supplement: Supplementary file 1 [file 8630293]

# **Screening of Pro–Asp Sequences Exposed on Bacteriophage M13 as an Ideal Anchor for Gold Nanocubes**

*Hwa Kyoung Lee, Yujean Lee, Hyori Kim, Hye-Eun Lee, Hyejin Chang, Ki Tae Nam, Dae Hong  
Jeong, Junho Chung*

## **SUPPLEMENTARY FIGURES**

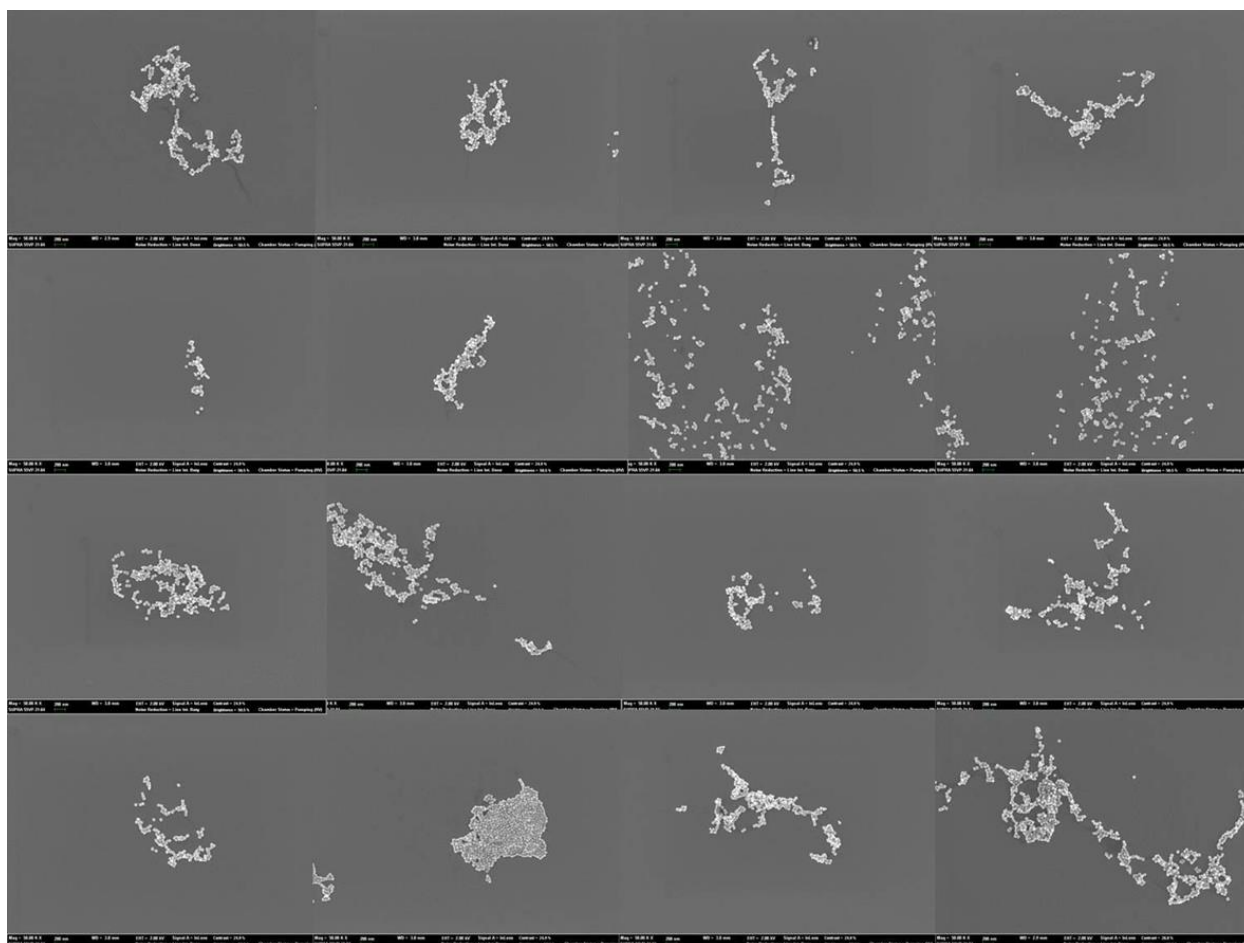

**Figure S1.** Randomly selected SEM images of gold nanocubes bound to wild-type bacteriophages.

The images were acquired at 50K magnification.

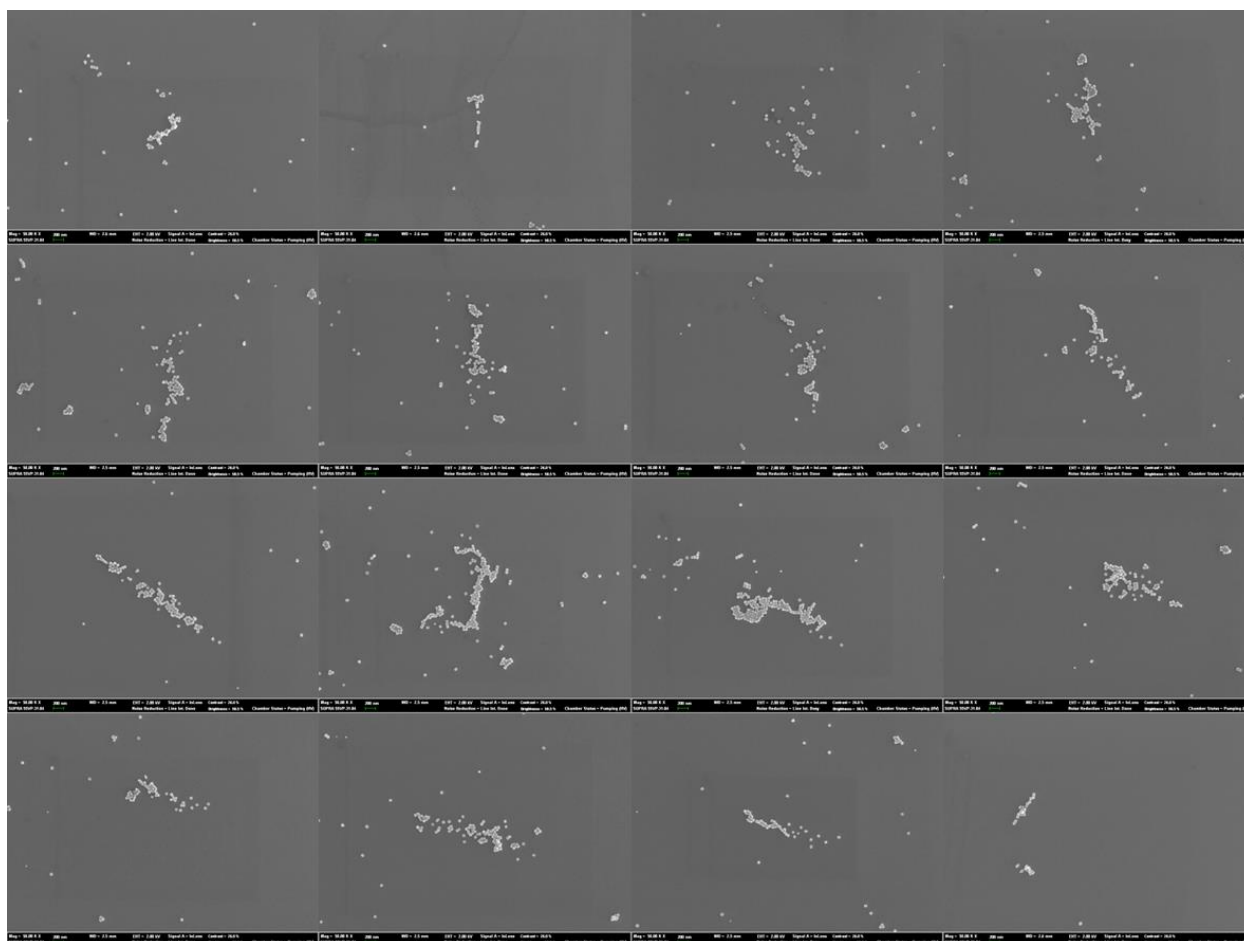

**Figure S2.** Randomly selected SEM images of gold nanocubes bound to VSGSPDS bacteriophage. The images were acquired at 50K magnification.

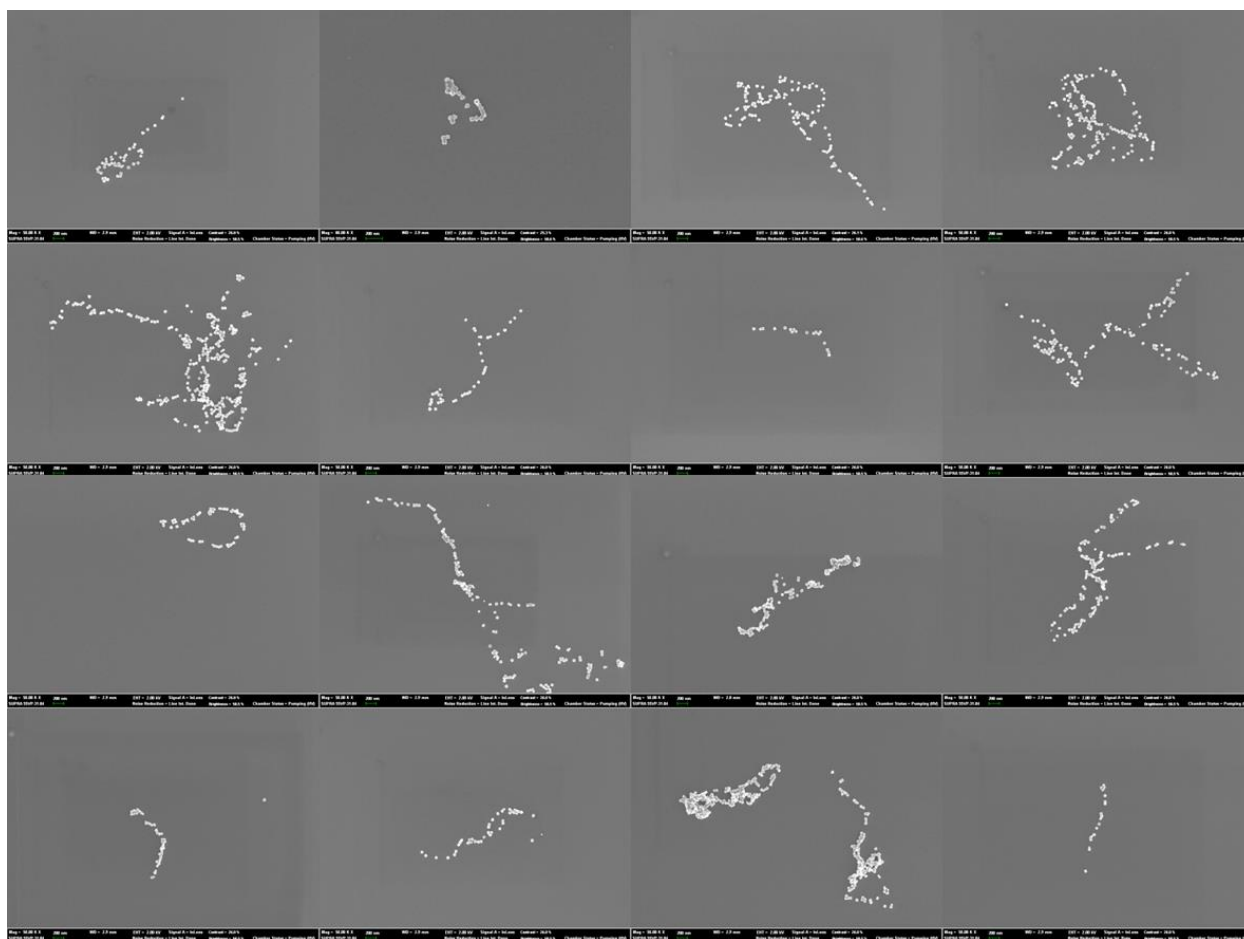

**Figure S3.** Randomly selected SEM images of gold nanocubes bound to PD bacteriophages. The images were acquired at 50K magnification.
